# Supplementary material for: Proliferation of Undaria pinnatifida along the Atlantic coast of the Iberian Peninsula
Source: publisher site journal article supplement (doi:10.1515/bot-2025-0013), 2025-06-09
Supplement: Supplementary file 1 [file j_bot-2025-0013_suppl_003.xlsx]

## Sheet: Historical
Supplementary Table S1: List of locations where Undaria pinnatifida was recorded along the Atlantic coast of the Iberian Peninsula between 1988 and 2023 by country (Portugal- PT and Spain - ES).
ID	Locality	Region	Country	Latitude	Longitude	Year	Date	Substrate	Records	Comment		Proliferation of Undaria pinnatifida along the Atlantic coast of the Iberian Peninsula
1	Gijón	Bay of Biscay	ES	43°32'47.9"N	5°40'11.1"W	1995	April 1995	Artificial	Salinas et al. (1996)			Mar Humet et al.
2	Gijón	Bay of Biscay	ES	43°34'55.8"N	5°41'40.4"W	2002	2002-05-22	Artificial	Perez-Ruzafa et al. (2002)			DOI 10.1515/bot-2025-0013
3	Cudillero	Bay of Biscay	ES	43°34'08.8"N	6°09'07.0"W	2002	2002-02-19	Artificial	Perez-Ruzafa et al. (2002)
4	Lastres	Bay of Biscay	ES	43°31'02.1"N	5°15'53.2"W	2007	2007-06-27	Artificial	Peteiro (2008)	attached to floating marina piers
5	Lastres	Bay of Biscay	ES	43°31'02.1"N	5°15'53.2"W	2008	2008	Artificial	Peteiro (2008)
6	Peizas	Upper Rias	ES	43°35'25.6"N	7°16'56.9"W	2017	May 2017	NA	Blanco et al., (2021)
7	Burela	Upper Rias	ES	43°40'17.2"N	7°21'28.9"W	2017	May 2017	NA	Blanco et al., (2021)
8	Xillo	Upper Rias	ES	43°44’45.73"N	7°39’3.51"W	2021	2021	Natural	Carreira-Flores et al., (2023)
9	S. Roman	Upper Rias	ES	43°43’16.48"N	7°37’38.22"W	2021	2021	Natural	Carreira-Flores et al., (2023)
10	Cedeira	Upper Rias	ES	43°39'32.2"N	8°04'23.7"W	2017	May 2017	NA	Blanco et al., (2021)
11	Ferrol	Upper Rias	ES	43°28'14.8"N	8°19'00.4"W	2001	2001-12-16	Natural	Cremades et al. (2006)	Playa Cariño, Ferrol, ría de Ferrol
12	Ferrol	Upper Rias	ES	43°27'54.4"N	8°18'14.7"W	2004	2004-05-04	Natural	Cremades et al. (2006)	Punta de San Cristóbal, Ferrol, ría de Ferrol
13	Punta do Segaño	Upper Rias	ES	43°27'14.7"N	8°18'44.5"W	2005	26/2/2005	NA	Cremades et al. (2006)	A Mueladel Segaño, Ares, ría de Ferro
14	Ares	Upper Rias	ES	43°25'36.5"N	8°14'31.0"W	2004	2004-03-08	NA	Cremades et al. (2006)	As Mirandas, Ares, ría de Ares y Betanzos
15	Puerto Lorbé	Upper Rias	ES	43°23'27.3"N	8°17'52.4"W	1996	1996-04-13	Artificial	Perez-Ruzafa et al. (2002)	A Coruña: Ría de Betanzos, puerto de Lorbé
16	Punta Gaboteira	Upper Rias	ES	43°23'10.4"N	8°17'04.0"W	2001	2001-02-03	Natural	Cremades et al. (2006)	Punta Gaboteira, Sada, Ría de Be-tanzos
17	Veigue	Upper Rias	ES	43°23'00.1"N	8°17'18.3"W	1996	1996-09-29	Natural	Perez-Ruzafa et al. (2002)	A Coruña: Ría de Betanzos, playa de San Pedro de Veigue
18	Sada	Upper Rias	ES	43°22'49.7"N	8°15'53.6"W	2002	22/4/2002	Natural	Cremades et al. (2006)	Ensenada de Lou-rido, Sada, ría de Betanzos
19	A Coruña	Upper Rias	ES	43°22'10.3"N	8°23'49.7"W	2000	2000-05-05	Artificial	Perez-Ruzafa et al. (2002)	A Coruña: Embarcadero, Dársena
20	A Coruña	Upper Rias	ES	43°22'09.9"N	8°23'03.8"W	2001	2001-06-22	Artificial	Cremades et al. (2006)	Dique flotante, dique de Abrigo, A Coruña,
21	San Antón	Upper Rias	ES	43°21'57.0"N	8°23'16.0"W	2004	2004-02-08	Natural	Cremades et al. (2006)	San Antón, A Coruña, ría de A Coruña
22	Malpica	Upper Rias	ES	43°19'25.8"N	8°48'29.4"W	2006	2006-04-26	Artificial	Cremades et al. (2006)	Puerto de Malpica, Malpica
23	Pontecesp	Upper Rias	ES	43°15'48.0"N	8°57'06.7"W	2006	26/4/2006	Natural	Cremades et al. (2006)	Playa Hermida,Ponteceso, ría de Corme y Lax
24	P. Besugueira	Upper Rias	ES	43°13'32.3"N	9°00'13.8"W	2017	May 2017	NA	Blanco et al., (2021)
25	Laxe	Upper Rias	ES	43°13'23.1"N	9°00'15.4"W	2006	2006-03-18	Artificial	Cremades et al. (2006)	Puerto de Laxe, Laxe
26	Muxía	Upper Rias	ES	43°06'21.1"N	9°09'57.7"W	2004	2004-04-07	Natural	Cremades et al. (2006)	Playa del Lago, Muxía
27	Muxía	Upper Rias	ES	43°05'58.0"N	9°13'18.9"W	2017	May 2017	NA	Blanco et al., (2021)
28	Cabo Tourinan	Upper Rias	ES	43°02'39.2"N	9°17'17.2"W	2021	2021-05-24	Natural	Pereira J et al., (2022)
29	Punta Arnela	Lower Rias	ES	42°56'23.9"N	9°13'39.0"W	1998	1998-02-28	Natural	Perez-Ruzafa et al. (2002)	Punta Arnela, Ensenada de O Sardiñeiro, Fisterra
30	Quenxe	Lower Rias	ES	42°56'11.4"N	9°11'22.5"W	2021	2021-05-26	Natural	Pereira J et al., (2022)
31	Cabo Cee	Lower Rias	ES	42°54'57.2"N	9°11'15.9"W	1998	1998-02-27	Natural	Perez-Ruzafa et al. (2002)	Cabo Cee, Corcubión, Ría de Corcubión
32	Fisterra	Lower Rias	ES	42°54'48.8"N	9°15'50.5"W	2017	May 2017	NA	Blanco et al., (2021)
33	Corveiro	Lower Rias	ES	42°54'15.9"N	9°15'38.8"W	2021	2021-05-26	Natural	Pereira J et al., (2022)
34	Quilmás	Lower Rias	ES	42°52'29.5"N	9°08'52.0"W	2017	July 2017	NA	Blanco et al., (2021)
35	Portocubelo	Lower Rias	ES	42°48'16.5"N	9°08'20.8"W	2017	July 2017	NA	Blanco et al., (2021)
36	Playa Ximprón	Lower Rias	ES	42°47'48.4"N	9°08'24.6"W	2021	2021-05-25	Natural	Pereira J et al., (2022)
37	Esteiro	Lower Rias	ES	42°47'01.8"N	8°58'51.0"W	2002	2002-04-29	NA	Cremades et al. (2006)	Esteiro, Outes, ría de Muros y Noia
38	Punta Outeirino	Lower Rias	ES	42°44'44.3"N	9°04'36.5"W	2021	2021-05-25	Natural	Pereira J et al., (2022)
39	Porto do Son	Lower Rias	ES	42°43'39.9"N	9°00'14.1"W	1998	1998-01-30	Artificial	Perez-Ruzafa et al. (2002)	Pta. Sagrado, Porto do Son, Ría de Muros e Noia
40	Porto do Son	Lower Rias	ES	42°42'37.8"N	9°00'39.6"W	2006	2006-01-30	Natural	Cremades et al. (2006)	Playa de Arnela,Porto do Son, ría de Muros e Noia
41	Castro Baroña	Lower Rias	ES	42°41'43.5"N	9°01'54.1"W	2017	July 2017	NA	Blanco et al., (2021)
42	Praia As Furnas	Lower Rias	ES	42°39'05.5"N	9°02'21.3"W	2017	March 2017	NA	Blanco et al., (2021)
43	Pedras da Catía	Lower Rias	ES	42°37'10.3"N	9°03'33.4"W	2017	July 2017	NA	Blanco et al., (2021)
44	Isla Benecia	Lower Rias	ES	42°36'03.8"N	8°52'38.6"W	2005	2005-05-25	Natural	Cremades et al. (2006)	Sur de isla Benencia, Boiro, ría de Arousa
45	Faro Corrubedo	Lower Rias	ES	42°34'43.4"N	9°04'54.3"W	2017	March 2017	NA	Blanco et al., (2021)
46	Corrubedo	Lower Rias	ES	42°34'35.9"N	9°05'23.5"W	2021	2021-06-26	Natural	Pereira J et al., (2022)
47	Corribudeo	Lower Rias	ES	42°34'33.4"N	9°04'04.8"W	2001	2001-03-01	Natural	Cremades et al. (2006)	Insua Furnas, Corrubedo, Ribeira
48	Punta Insuela	Lower Rias	ES	42°34'29.4"N	8°57'38.3"W	2004	2004-01-23	Natural	Cremades et al. (2006)	Punta Insuela, Riveira, ría de Arousa
49	Ponta Cavalo	Lower Rias	ES	42°34'20.6"N	8°53'02.5"W	1995	1995-06-23	Natural	Perez-Ruzafa et al. (2002)	Pontevedra: ría de Arousa, Faro de la Isla
50	Praia Area da Secada	Lower Rias	ES	42°34'20.4"N	8°52'59.4"W	1995	1995-09-22	NA	Perez-Ruzafa et al. (2002)	Faro de Piedraseca, Ría de Arosa
51	Punta Barbafeita	Lower Rias	ES	42°34'06.1"N	8°53'28.0"W	1997	1997-10-17	Natural	Perez-Ruzafa et al. (2002)	Punta Barbafeita, Illa de Arousa, Ría de Arousa
52	O Touro	Lower Rias	ES	42°32'45.8"N	8°59'02.3"W	2021	2021-06-26	Natural	Pereira J et al., (2022)
53	Punta Quilme	Lower Rias	ES	42°32'23.1"N	8°52'44.9"W	1997	1997-08-19	Natural	Perez-Ruzafa et al. (2002)	Punta Quilme, Illa de Arousa, Ría de Arousa
54	Illa de Arousa	Lower Rias	ES	42°31'47.8"N	8°51'58.8"W	2005	2005-12-22	NA	Cremades et al. (2006)	Al sur de la illade Arousa, ría de Arousa
55	Punta Banqueira	Lower Rias	ES	42°31'38.8"N	8°52'40.3"W	1998	1998-03-30	Natural	Perez-Ruzafa et al. (2002)	Punta Banqueira, A Illa, Ría de Arousa
56	Arguiño	Lower Rias	ES	42°31'26.2"N	9°00'40.2"W	1996	1996-10-29	NA	Perez-Ruzafa et al. (2002)	A Coruña: Ría de Arousa, Aguiño
57	Puerto Tabrove	Lower Rias	ES	42°31'11.2"N	8°49'45.5"W	1991	1991-07-02	Artificial	Perez-Ruzafa et al. (2002)	puerto de Tragove, Cambados, ría de Arosa
58	Aguiño	Lower Rias	ES	42°30'58.0"N	9°00'35.9"W	2017	April 2017	NA	Blanco et al., (2021)
59	Puerto de Meloxo	Lower Rias	ES	42°29'27.0"N	8°53'18.0"W	1994	1994-04-14	NA	Perez-Ruzafa et al. (2002)	Pontevedra: cerca del puerto de Meloxo
60	Illa d'A Toxa	Lower Rias	ES	42°29'22.4"N	8°51'10.1"W	1998	1998-01-30	NA	Perez-Ruzafa et al. (2002)	A Toxa, O Grove, Ría de Arousa
61	Sálvora	Lower Rias	ES	42°28'14.6"N	9°00'03.1"W	2017	April 2017	NA	Blanco et al., (2021)
62	O Grove	Lower Rias	ES	42°29'52.4"N	8°51'43.6"W	1988	1988	Artificial	Caamaño et al., (1990)
63	O Grove	Lower Rias	ES	42°27'44.6"N	8°54'42.0"W	2005	2005-11-18	Natural	Cremades et al. (2006)	Area da Cruz, O Grove, ría de Arousa
64	O Grove outer	Lower Rias	ES	42°27'25.8"N	8°53'30.8"W	2017	April 2017	NA	Blanco et al., (2021)
65	O Grove - Combarro	Lower Rias	ES	42°27'23.2"N	8°53'09.9"W	2016	2016-08-22	NA	CS	https://www.inaturalist.org/observations/134414151
66	Estofallas	Lower Rias	ES	42°24'54.6"N	8°52'51.5"W	2017	June 2017	NA	Blanco et al., (2021)
67	Isla de Tambo	Lower Rias	ES	42°24'41.3"N	8°42'44.6"W	2005	2005-07-07	Natural	Cremades et al. (2006)	Noroestede la isla de Tambo, Marín, ría de Pontevedra
68	Ría de Pontevedra, Sanxenxo	Lower Rias	ES	42°23'54.1"N	8°48'40.0"W	2018	2018-07-14	NA	CS	https://www.inaturalist.org/observations/142204447
69	Punta Barreiros	Lower Rias	ES	42°23'46.6"N	8°47'45.5"W	1997	1997-05-06	Natural	Perez-Ruzafa et al. (2002)	Punta Barreiros, Sanxenxo, Ría de Pontevedra
70	Illa Ons	Lower Rias	ES	42°23'24.0"N	8°55'31.6"W	2000	2000-06-11	Natural	Perez-Ruzafa et al. (2002)	Playa de Melide, Illa de Ons, Bueu Ría de Pontevedra
71	Illa Ons	Lower Rias	ES	42°22'23.8"N	8°55'56.3"W	2017	June 2017	NA	Blanco et al., (2021)
72	Cabo Udra	Lower Rias	ES	42°19'59.8"N	8°49'35.8"W	2017	April 2017	NA	Blanco et al., (2021)
73	Rubans	Lower Rias	ES	42°18'07.6"N	8°51'03.3"W	2017	July 2017	NA	Blanco et al., (2021)
74	Cangas	Lower Rias	ES	42°17'41.8"N	8°50'53.5"W	2004	2004-01-25	Natural	Cremades et al. (2006)	Punta Area Brava, Cangas, ría de Aldán
75	Aldán	Lower Rias	ES	42°16'47.3"N	8°49'15.5"W	1997	1997-11-16	NA	Perez-Ruzafa et al. (2002)	Pto Niño do Lordo (A Aldán)
76	Moaña	Lower Rias	ES	42°16'27.2"N	8°44'10.3"W	2004	17/11/2004	Artificial	Cremades et al. (2006)	Puerto de Moaña, Moaña, ría de Vigo
77	Punta Crotés	Lower Rias	ES	42°16'10.5"N	8°44'37.9"W	2004	09/3/2004	Natural	Cremades et al. (2006)	Punta Cortés, Cangas, ría de Vigo
78	Cangas	Lower Rias	ES	42°15'45.8"N	8°46'49.3"W	2004	2004	NA	Cremades et al. (2006)	Punta Greixiña, Cangas, ría de Vig
79	Punta Limens	Lower Rias	ES	42°15'35.1"N	8°48'49.7"W	2004	2004-02-22	Natural	Cremades et al. (2006)	Punta Limens, Cangas, ría de Vigo
80	Playa de Negra	Lower Rias	ES	42°15'29.4"N	8°50'15.0"W	2005	2005-02-12	Natural	Cremades et al. (2006)	Playa de Nerga, Cangas, ría de Vigo
81	Ensenada de Cangas	Lower Rias	ES	42°15'20.1"N	8°47'06.2"W	2004	2004-09-17	Artificial	Cremades et al. (2006)	Ensenada de Cangas, Cangas, ría de Vigo
82	Nerga	Lower Rias	ES	42°15'13.4"N	8°49'18.4"W	2017	March 2017	NA	Blanco et al., (2021)
83	P. Escodelo	Lower Rias	ES	42°14'59.0"N	8°51'57.5"W	2017	June 2017	NA	Blanco et al., (2021)
84	Punta Borneira	Lower Rias	ES	42°14'49.3"N	8°47'36.7"W	1997	1997-04-15	Natural	Perez-Ruzafa et al. (2002)	Punta Borneira, Cangas, Ría de Vigo
85	Ilhas Cies	Lower Rias	ES	42°14'18.9"N	8°54'07.7"W	2003	2003-05-18	Natural	Cremades et al. (2006)	Playa Cantadeira, Islas Cíes, ría de Vigo
86	Sirenita	Lower Rias	ES	42°12'04.2"N	8°47'07.4"W	2017	June 2017	NA	Blanco et al., (2021)
87	Puerto O Vao	Lower Rias	ES	42°11'38.3"N	8°48'05.3"W	2017	June 2017	NA	Blanco et al., (2021)
88	Canido	Lower Rias	ES	42°11'28.3"N	8°48'20.7"W	2017	April 2017	NA	Blanco et al., (2021)
89	Cabo Estai	Lower Rias	ES	42°11'12.5"N	8°48'57.8"W	2017	June 2017	NA	Blanco et al., (2021)
90	Prado	Lower Rias	ES	42°09'33.2"N	8°49'09.8"W	2021	2021-05-27	Natural	Pereira J et al., (2022)
91	Bayona	Lower Rias	ES	42°07'12.9"N	8°50'51.5"W	2004	2004-03-08	Artificial	Cremades et al. (2006)	Puerto pesquero de Bayona, Bayona, ríade Bayona
92	Faro Vello Silleiro	Lower Rias	ES	42°06'42.7"N	8°53'58.0"W	2021	2021-05-27	Natural	Pereira J et al., (2022)
93	Oia	Lower Rias	ES	42°00'09.3"N	8°52'37.6"W	2021	2021-05-28	Natural	Pereira J et al., (2022)
94	Fedorento	Lower Rias	ES	41°54'36.6"N	8°52'40.8"W	2021	2021-05-28	Natural	Pereira J et al., (2022)
95	Cabedelo, Viana	North Portugal	PT	41°40'45.2"N	8°50'12.1"W	2021	2021-03-15	Artificial	(Pereira J et al., 2022)
96	Carvalhido	North Portugal	PT	41°22'53.4"N	8°46'17.4"W	2021	2021-03-30	Natural	(Pereira J et al., 2022)
97	Marinha, Póvoa	North Portugal	PT	41°22'34.1"N	8°45'51.6"W	2021	2021-03-28	Artificial	(Pereira J et al., 2022)
98	Forte São João	North Portugal	PT	41°22'25.3"N	8°46'10.7"W	2007	2007	Artificial	(R. Araujo et al., 2009)	Douro Litoral at Póvoa de Varzim (marina)
99	Praia da Barra, Aveiro	Central Portugal	PT	41°20'27.9"N	8°45'02.6"W	2021	2021-01-13	Natural	(Pereira J et al., 2022)
100	Buarcos	Central Portugal	PT	40°38'27.7"N	8°45'07.6"W	2021	2021-03-14	Artificial	(Pereira J et al., 2022)
101	Praia da Barra, Aveiro	Central Portugal	PT	40°38'27.7"N	8°45'07.6"W	2007	2007	Artificial	(R. Araujo et al., 2009)	Beira Litoral at Barra de Aveiro
102	Barra de Aveiro	Central Portugal	PT	40°38'21.1"N	8°43'46.7"W	2019	2019-03-24	NA	CS	https://www.inaturalist.org/observations/21554329
103	Buarcos	Central Portugal	PT	40°10'39.0"N	8°54'12.7"W	2021	2021-03-03	Natural	(Pereira J et al., 2022)
104	Buarcos	Central Portugal	PT	40°10'39.0"N	8°54'12.7"W	2013	2013	Natural	(Veiga et al., 2014)
105	Buarcos	Central Portugal	PT	40°10'07.5"N	8°53'19.1"W	2019	2019-05-06	NA	CS	https://www.inaturalist.org/observations/62713388
106	Buarcos	Central Portugal	PT	40°09'57.9"N	8°53'04.4"W	2023	2023-07-30	NA	CS	https://www.inaturalist.org/observations/176077449
107	Buarcos	Central Portugal	PT	40°09'55.7"N	8°53'04.2"W	2023	2023-07-06	NA	CS	https://www.inaturalist.org/observations/171913638
108	Buarcos	Central Portugal	PT	40°09'48.6"N	8°52'49.4"W	2022	2022-06-17	NA	CS	https://www.inaturalist.org/observations/132523366
